# Supplementary material
Source: Springer Nature journal article supplement (https://www.springerprofessional.de/resource/supplementary/13638_2013_815_MOESM4_ESM.pdf/11898532)

## AF scheme

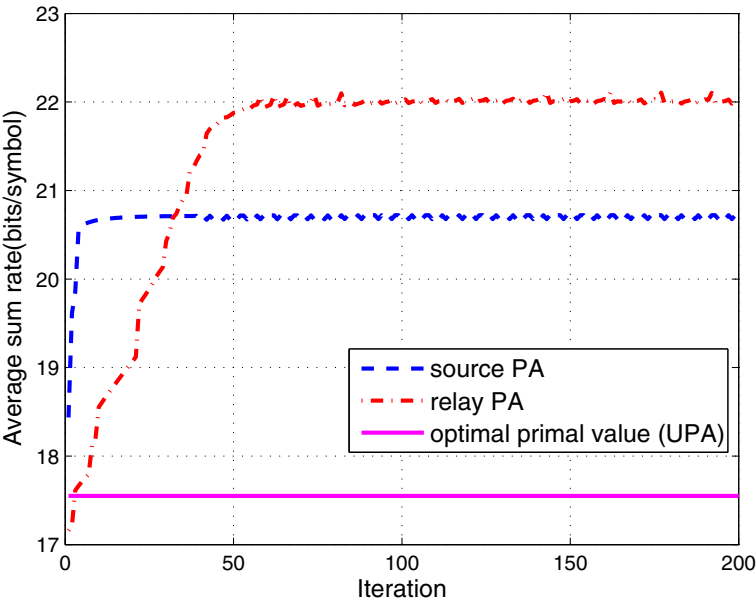

Supplement: MOESM4 [file 11898532]
